# Supplementary material
Source: Elsevier journal article supplement (https://neuropediatoolkit.org/wp-content/uploads/2023/11/mmc1.pdf)
Supplement: mmc1 [file mmc1.pdf]



# Pediatric NIH Stroke Scale in Nigeria

Updated for acute and chronic stroke

[www.pednihss.com](http://www.pednihss.com)

Pocket Guide

# Instructions

Acute/subacute strokes occurring in the last few days:

- Onset of symptoms should be sudden.
- A child with a new stroke has low muscle tone on the weaker side of the body.
- A child with a new stroke has no atrophy.

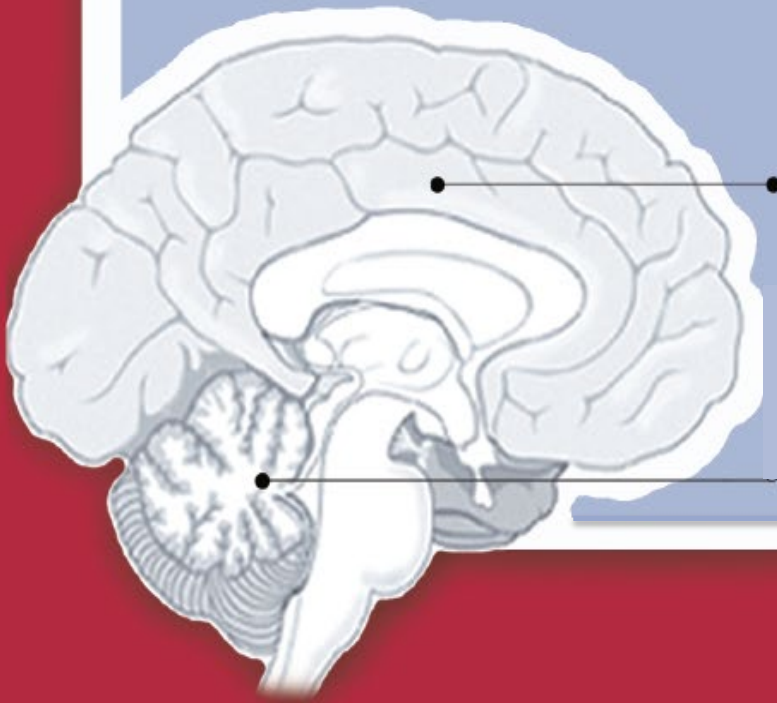

# Instructions

**\*Overview: Members of the healthcare team should assess for signs of prior/chronic stroke not previously recorded: Look for asymmetry, atrophy, high muscle tone, and gait abnormalities.**

- 1) Is there atrophy on one side of the body? If yes, there is concern for chronic stroke. Look at forearm, hand size, and lower leg/calf muscle. Are they smaller?
- 2) Is there increased muscle tone/tightness on one side of the body? (chronically)
- 3) Gait: Does the patient drag one leg, or does one leg turn out slightly and not lift as high off the ground when the patient walks?
- 4) Does one arm swing less than the other arm when walking?

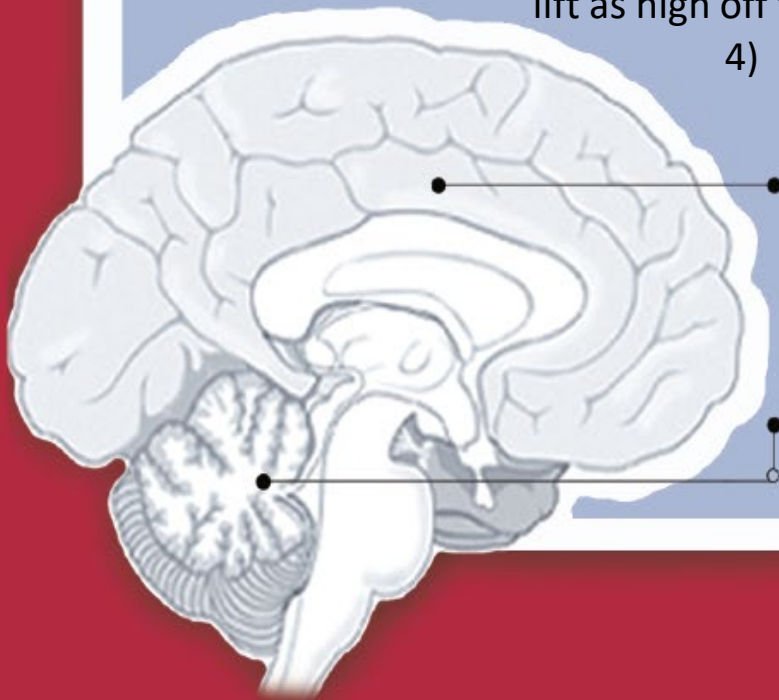

**\*If there is concern for prior stroke – ask parents how long their child has had these symptoms.**

# Instructions

**\*Quick screen for prior stroke in apparently healthy children in a busy clinic:**

1. Check for pronator drift: have child hold both hands outstretched, palms up. If one hand drifts down, maybe weaker.
2. Check for smile asymmetry, is one side flattened/won't smile
3. Hand asymmetry /atrophy– is one hand is smaller, atrophied?
4. Tap thumb and finger together (first and second digit opposition)  
Watch both hands is one slower and does one hand fatigue faster?
5. Hop up and down on one foot, check both sides. Is one side weaker?
6. Watch the child walk: does one arm swing less than the other side? Do they drag one foot?  
If you have concerns, then do full PedNIHSS.

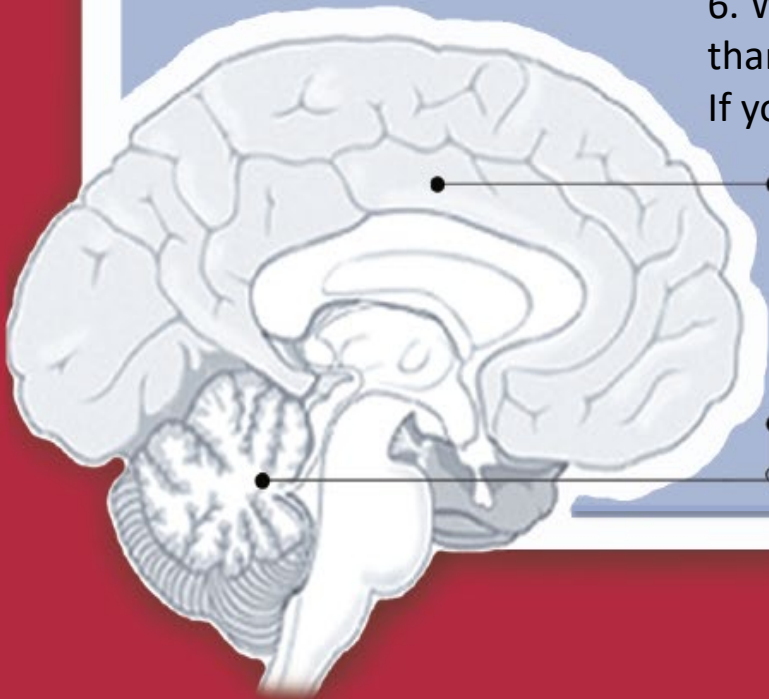

# Instructions

For the full PedNIHSS:  
Administer stroke scale items in the  
order listed within this booklet.

Follow directions provided for each  
exam item.

Record the findings by using the PedNIHSS form provided.

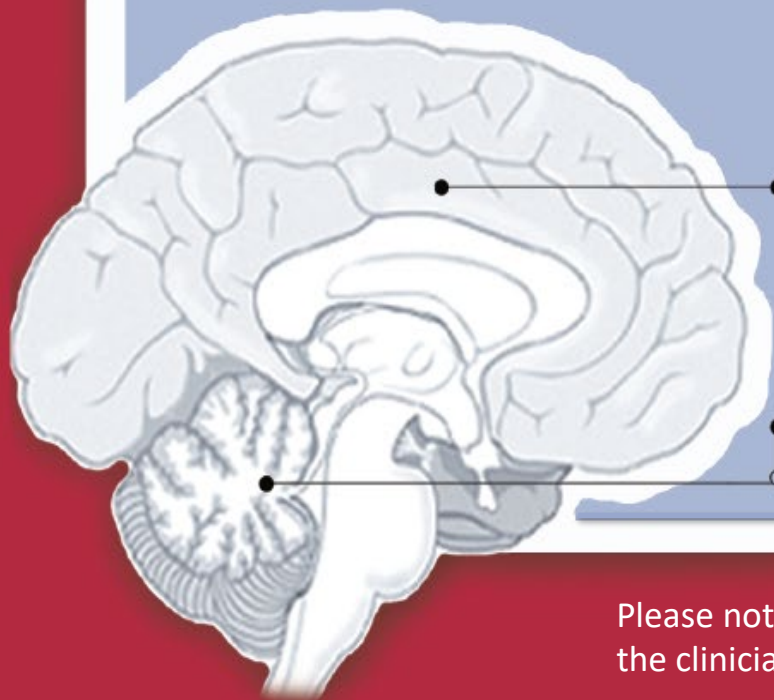

Use these cards for guidance in  
conducting this exam.

Onset symptoms: Date \_\_\_\_\_  
(DD/MM/YYYY)

Time \_\_\_\_:\_\_\_\_ (24 hours)

Please note: Scores should reflect what the patient does, not what  
the clinician thinks the patient can do.

# Instructions

Administer stroke scale items in the order listed. Follow directions provided for each exam item. Scores should reflect what the patient does, not what the clinician thinks the patient can do. **MODIFICATIONS FOR CHILDREN:** Modifications to testing instructions from the adult version for use in children are shown in bold italic with each item where appropriate. Items with no modifications should be administered and scored with children in the same manner as for adults.

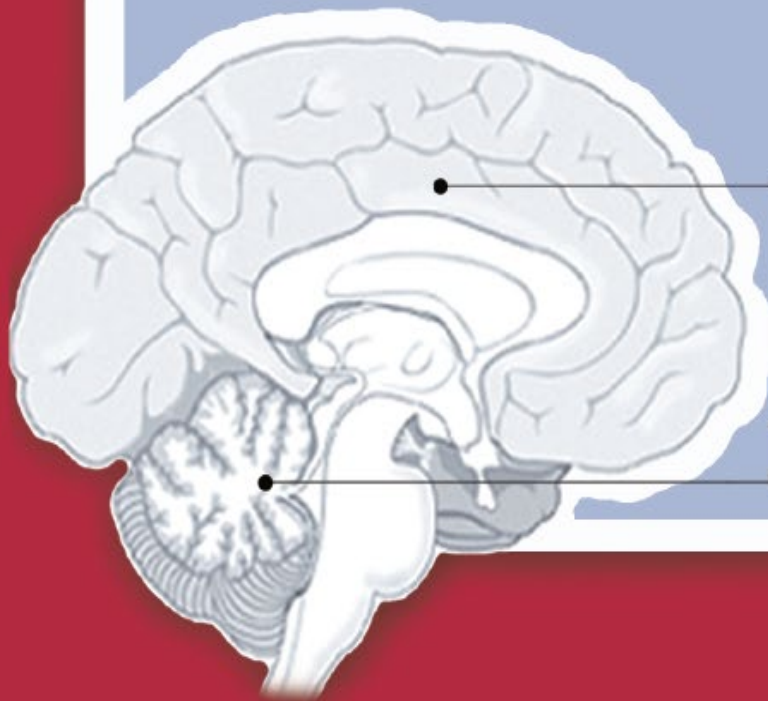

Case ID# \_\_\_\_\_

● EXAMINER \_\_\_\_\_

Onset symptoms: Date \_\_\_\_\_

● Time \_\_\_\_\_

# 1a

## Level of Consciousness

Must choose a response (even if patient has obstacles such as an endotracheal tube, language barrier, or orotracheal trauma/bandages).

### Score = 3

- Only if patient makes NO movement to noxious stimuli (other than reflexive posturing)

Alert; keenly responsive.

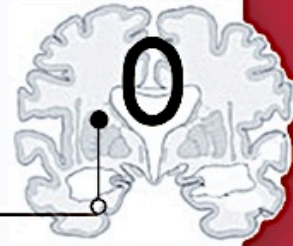

Not alert, but arousable by minor stimulation.

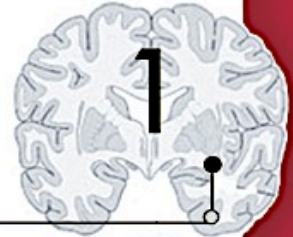

Not alert, requires repeated stimulation to attend.

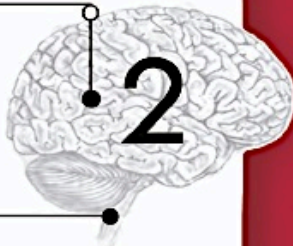

Responds only with reflex motor or autonomic effects or unresponsive.

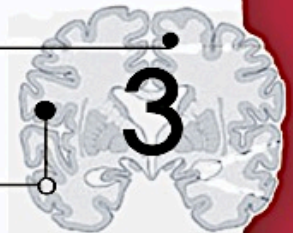

score

# LOC Questions

A familiar family member **MUST** be present.

- **“How old are you?”**
  - Must speak or show fingers for correct age
- **“Where is ‘mommy’/ ‘daddy’?”** (or familiar family member)
  - Must correctly point to or gaze toward the direction of this family member

## EXCEPTION

Score = 1 Unable to speak due to the following:

- Endotracheal intubation, orotracheal trauma, severe dysarthria (any cause), language barrier, or any problem NOT secondary to aphasia

Answers both questions correctly.

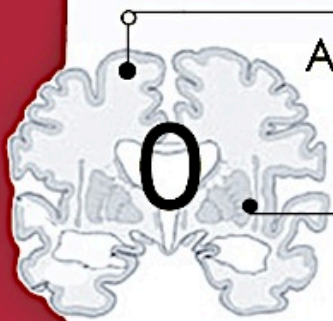

Answers one question correctly.

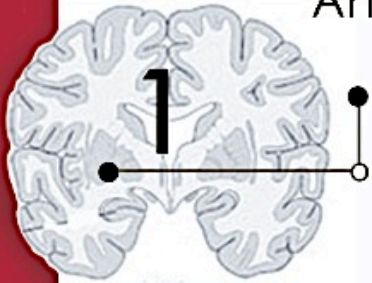

Answers neither question correctly.

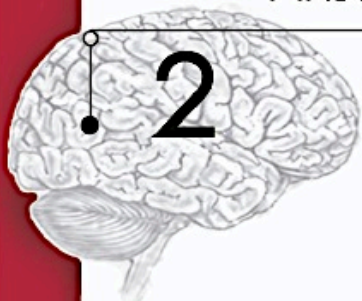

score



# 1c

## LOC Commands

### ONLY score FIRST ATTEMPTS

- Ask patients to open and close their eyes and do either:  
“Show me your nose” or “Touch your nose”
  - If cannot use hands, give another one-step command
- Give credit if straightforward attempt made and not completed due to weakness
- If no response to the above, act out task and score as follows: none, one or two commands

Patients with trauma, amputation or other physical hindrance should be given suitable one-step commands.

Performs both tasks correctly.

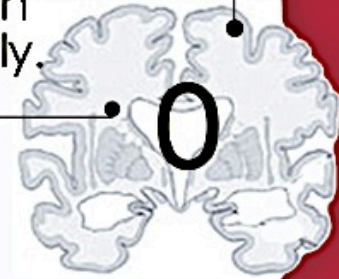

Performs one task correctly.

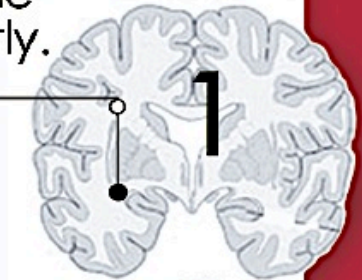

Performs neither task correctly.

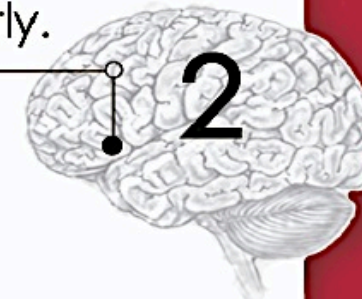

score

# Best Gaze

Gaze is testable in ALL aphasic patients

## Testing of horizontal eye moments

- Voluntary or reflexive eye movements scored
- Caloric testing NOT scored

## Score = 1

- Patient with conjugate deviation overcome by voluntary/reflexive activity
- Isolated peripheral nerve paresis (CN III, IV, VI)

## Investigator Chooses Appropriate Score (0 – 2) ONLY for:

- Patients with ocular trauma, bandages, preexisting blindness, or other disorder of visual acuity or fields using reflexive movements

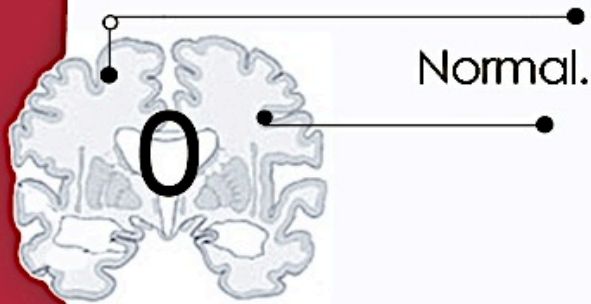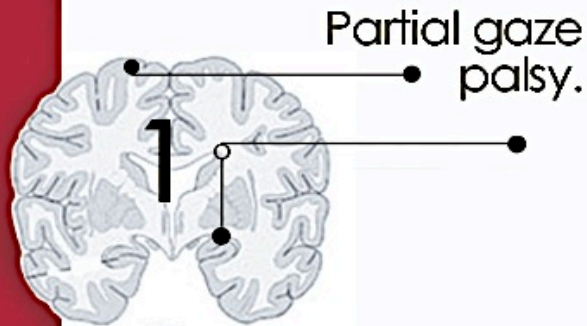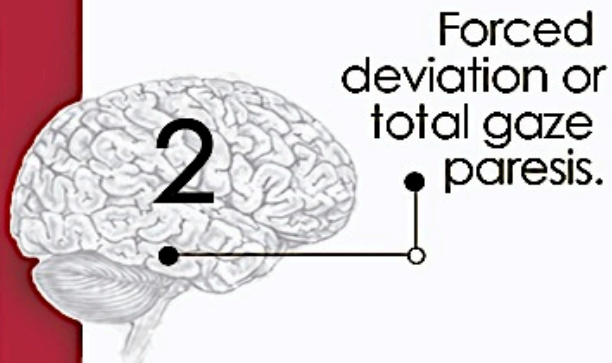

score

# 3

## Visual

Upper and lower quadrants tested by confrontation  
(USE FINGER COUNTING)

If unilateral blindness or enucleation, score remaining eye visual fields.

### Normal

- Looks at side of moving fingers appropriately (even if encouraged)

### Score = 1

- Clear-cut asymmetry, Quadrantanopia

### Score = 2

- Complete hemianopia

### Score = 3

- Blind (from any cause)

Double simultaneous stimulation (results used to answer question 11)

- Visual extinction present = score as a 1

No visual loss.

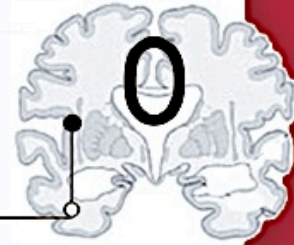

Partial hemianopia.

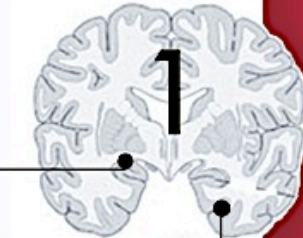

Complete hemianopia.

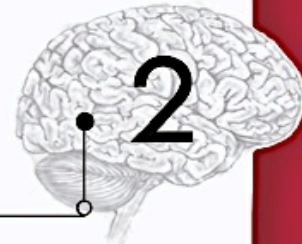

Bilateral hemianopia (including cortical blindness).

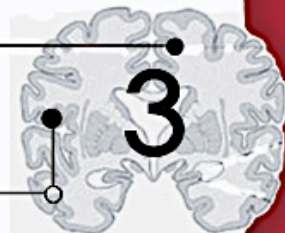

score

# Facial Palsy

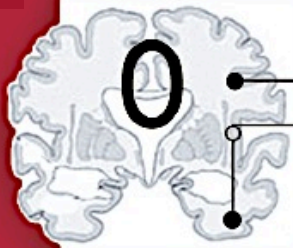

Normal symmetrical movement.

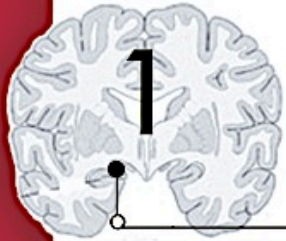

Minor paralysis (ex: asymmetrical smile)

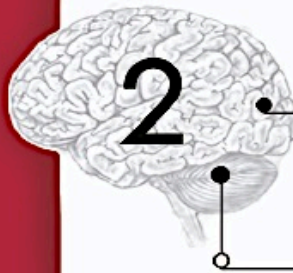

Partial paralysis (ex: lower face paralysis).

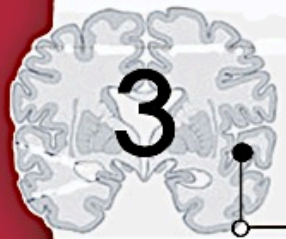

Complete paralysis of one or both sides.

Ask or act out to encourage patient to either:

- Show teeth
- Raise eyebrows
- Score face symmetry in response to noxious stimuli for poorly responsive or non-comprehending patient

**Remove facial obstructions below IF possible:**

- Facial trauma, bandages, tape or other physical barriers obscuring the patient's face

**score**

# 5

## Motor Arm and Leg

Place limb in the position below:

- Extend arms (palms down)
  - 90 degrees if sitting
  - 45 degrees if supine

**Drift is scored if arm falls in <10 seconds**

Begin in non-paretic arm

- Aphasic patient should be encouraged with voiced urgency (**NO** use of noxious stimuli)

Score = 9 (clearly write an explanation for score)

- Amputation or joint fusion at shoulder
- Immobilization by an IV board

Please note: If uncooperative for any reason, grade power in limbs by observing spontaneous or elicited movement according to the above scheme (excluding time limits).

5a. Left Arm

5b. Right Arm

No drift, limb holds for full 10 sec.

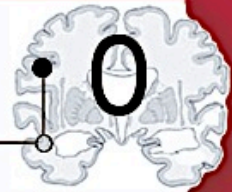

Drift, limb holds, but drifts down. Does not hit support.

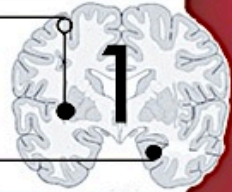

Some effort against gravity, drifts down to support.

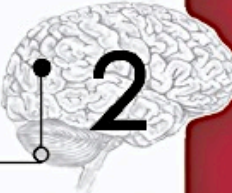

No effort against gravity, limb falls.

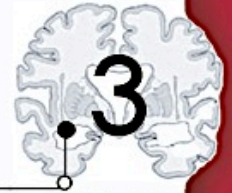

No Movement.

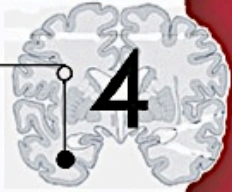

Amputation or joint fusion.

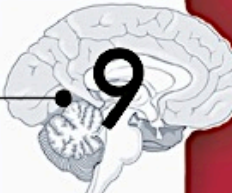

score

# Motor Arm and Leg

Place limb in the position below:

- Extend legs 30 degrees (always supine)

**Drift is scored if leg falls in <5 seconds**

Begin in non-paretic leg

- Aphasic patient should be encouraged with voiced urgency (**NO** use of noxious stimuli)

Score = 9 (clearly write an explanation for score)

- Amputation or joint fusion at hip
- Immobilization by an IV board

Please note: If uncooperative for any reason, grade power in limbs by observing spontaneous or elicited movement according to the above scheme (excluding time limits).

6a. Left Leg  
6b. Right Leg

## score

0 No drift, leg holds 30 degrees for full 5 sec.

1 Drift, leg falls, but does not hit bed.

2 Some effort against gravity, falls and hits bed.

3 No effort against gravity, leg falls immediately.

4 No Movement.

9 Amputation or joint fusion.

# 7

## Limb Ataxia

To find evidence of unilateral cerebellar lesion

Test with eyes open

Finger-nose-finger and heel-shin tests on both sides

### Ataxia

- Scored only if present and not proportionate to weakness
- Absent in patients who cannot understand or are paralyzed

Score = 9 (clearly write an explanation for score)

- Amputation or joint fusion

Please note: If uncooperative, substitute task with reaching for a toy using the upper extremity, and kicking a toy or examiner's hand.

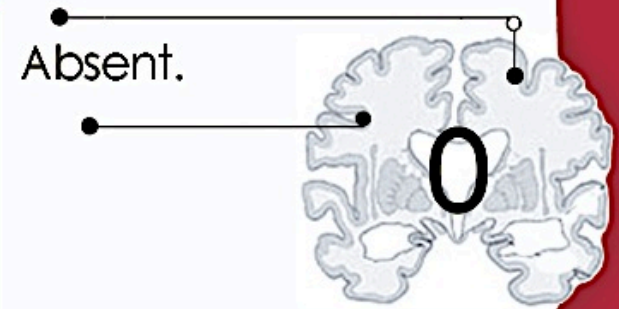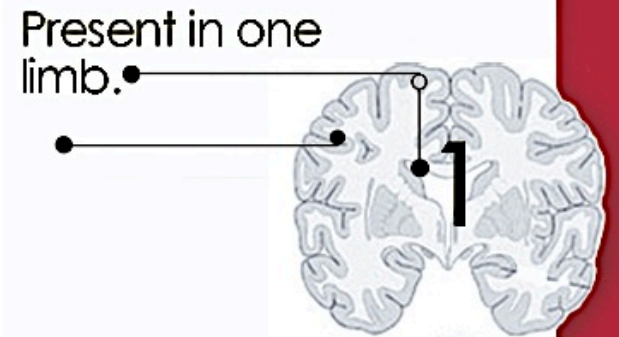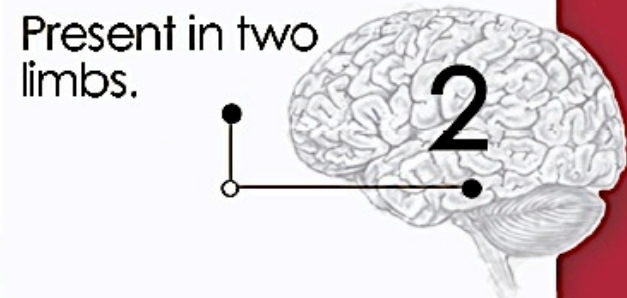

score

# Sensory

**Pinprick test** for sensation or grimace

*or*

**Noxious stimulus** in obtunded or aphasic patients for withdrawal

Abnormal sensory loss **ONLY** if attributed to stroke

- Test as many body areas (arms [not hands], legs, trunk, face)

Score = 0 or 1

- Stuporous and aphasic patients who cannot be assessed

Score = 2 (*severe or total loss of sensation*)

- Patient with brainstem stroke with bilateral loss of feeling
- No response
- Quadriplegic
- Coma (question 1a = 3)

Please note: If uncooperative, report gradations of sensory loss by observing for behavioral response to the pin prick and score according to the above scheme as "normal", "mildly diminished" or "severely diminished".

Normal, no  
sensory loss.

Mild to moderate  
sensory loss.

Severe to total  
sensory loss.

**score**



# 9

## Best Language

Ages 6 and up with normal language development prior to stroke onset:

- Describe the next two slides by naming items and describing pictures
- If patient has vision loss, place objects in his/her hand for identification repeatedly to encourage speaking
- Coma patients (question 1a = 3) will automatically score a 3
- Patients with stupor or limited cooperation should have a score chosen but only get a 3 if they are mute and follow no one-step commands

\*\*Comprehension is obtained from these responses and from interaction during the preceding general neurological exam.

Children 2y and up:  
Infants 4m to 2y:

No aphasia,  
normal.

Alerts to sound  
and orients visually.

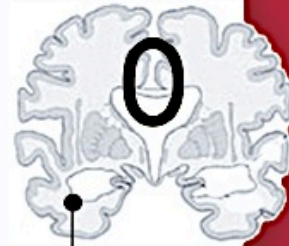

Mild to  
moderate  
aphasia.

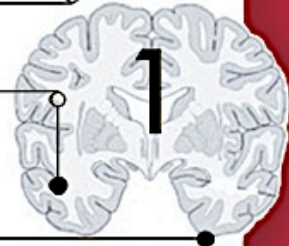

Severe aphasia.

Alerts to sound,  
but without  
spatial  
orientation.

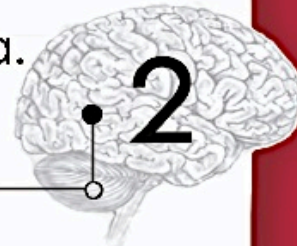

Mute, global  
aphasia.

Does not alert  
to sound.

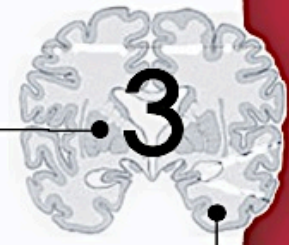

score

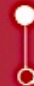

Naming Items: Name the pictures

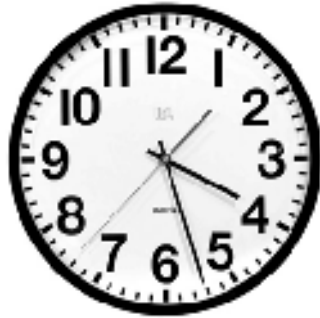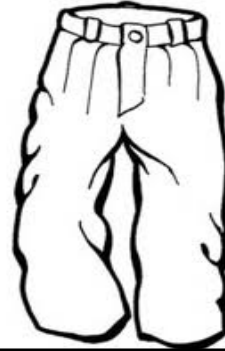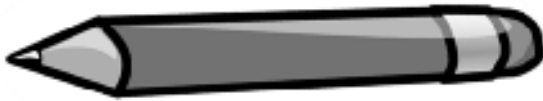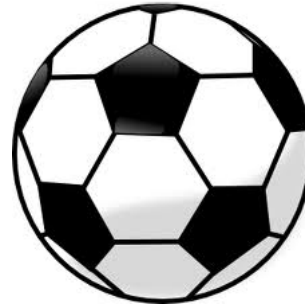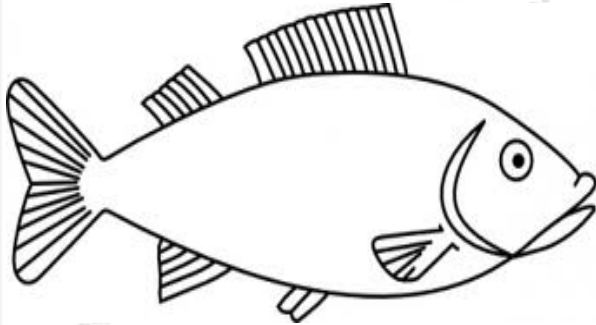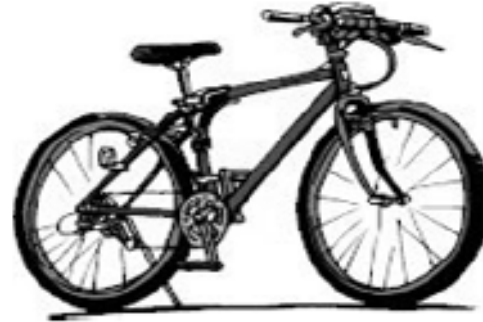

Language Items: Describe the pictures

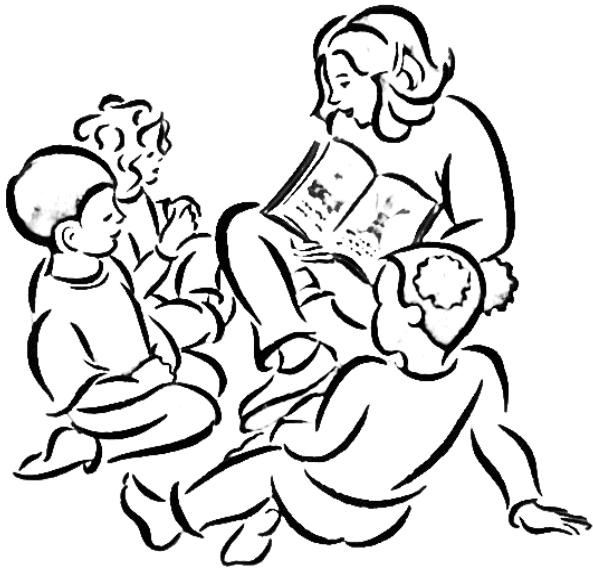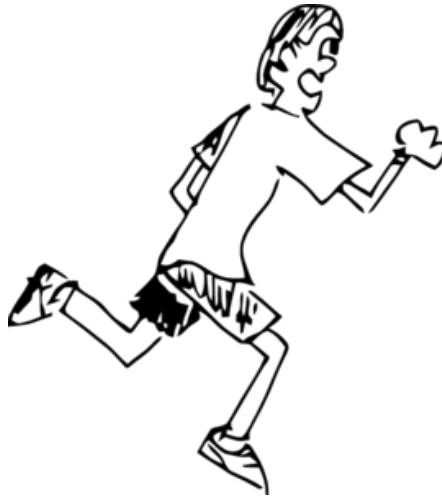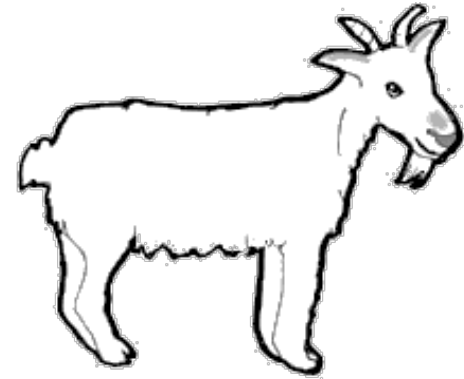

10

# Dysarthria

Do not tell the patient that you are assessing speech clarity

Obtain adequate sample of speech by naming and describing pictures

Score = 9

- Only if patient is intubated or has other physical barrier to producing speech
- **MUST** write an explanation of why

score

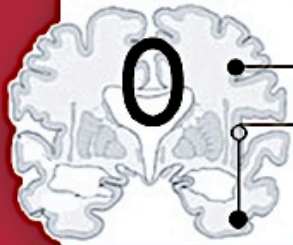

Normal.

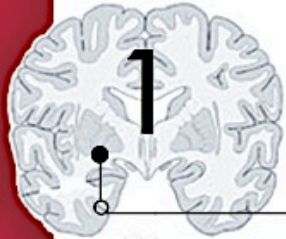

Mild to Moderate  
(some slurring).

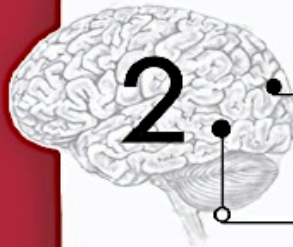

Severe  
(unintelligible).

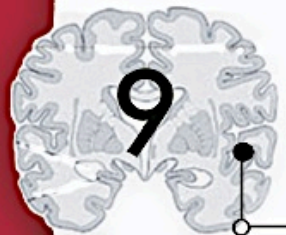

Intubated or other  
physical barrier.

# 11

## Extinction and Inattention

Sufficient information to identify neglect may be obtained during the prior testing

### Test attention to light touch on both sides

- Have patient close his/her eyes
- Touch the patient and ask do you feel it on the right/left/both

### Test attention to visual stimuli on both sides

#### Normal

- Severe visual loss preventing visual double simultaneous stimulation and cutaneous stimuli are normal
- Patient has aphasia but appears to attend both sides

#### Abnormal

- Visual spatial neglect or anosagnosia

This item is **NEVER** untestable since abnormality is only scored if present.

No abnormality.

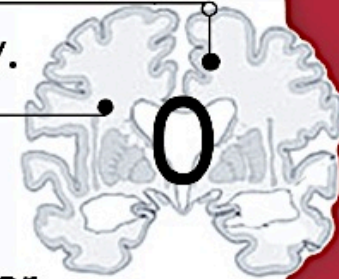

Inattention or extinction to bilateral simultaneous stimulation in one of the sensory modalities.

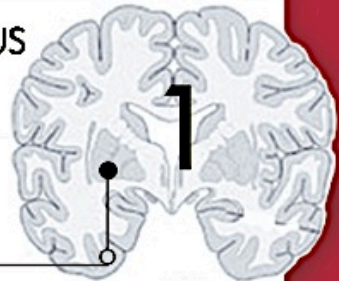

Profound hemi-inattention or hemi-inattention to more than one modality.

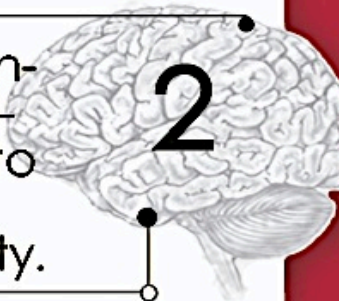

score

If patient not alert due to medications/ sedatives, note on forms.

| Question # and Topic           | Possible Scores                 |
|--------------------------------|---------------------------------|
| 1a) LOC                        | 0 1 2 3                         |
| 1b) LOC: Questions             | 0 1 2                           |
| 1c) LOC: Commands              | 0 1 2                           |
| 2) Best Gaze                   | 0 1 2                           |
| 3) Visual                      | 0 1 2 3                         |
| 4) Facial Palsy                | 0 1 2 3                         |
| 5a) Motor: Left Arm            | 0 1 2 3 4 9                     |
| 5b) Motor: Right Arm           | 0 1 2 3 4 9                     |
| 6a) Motor: Left Leg            | 0 1 2 3 4 9                     |
| 6b) Motor: Right Leg           | 0 1 2 3 4 9                     |
| 7) Limb Ataxia                 | 0 1 2                           |
| 8) Sensory                     | 0 1 2                           |
| 9) Best Language               | 0 1 2 3                         |
| 10) Dysarthria                 | 0 1 2 9                         |
| 11) Extinction and Inattention | 0 1 2                           |
| <b>TOTAL</b>                   | <b>Max possible score is 42</b> |

Scoring of a 9 = not testable and do not include in final total score

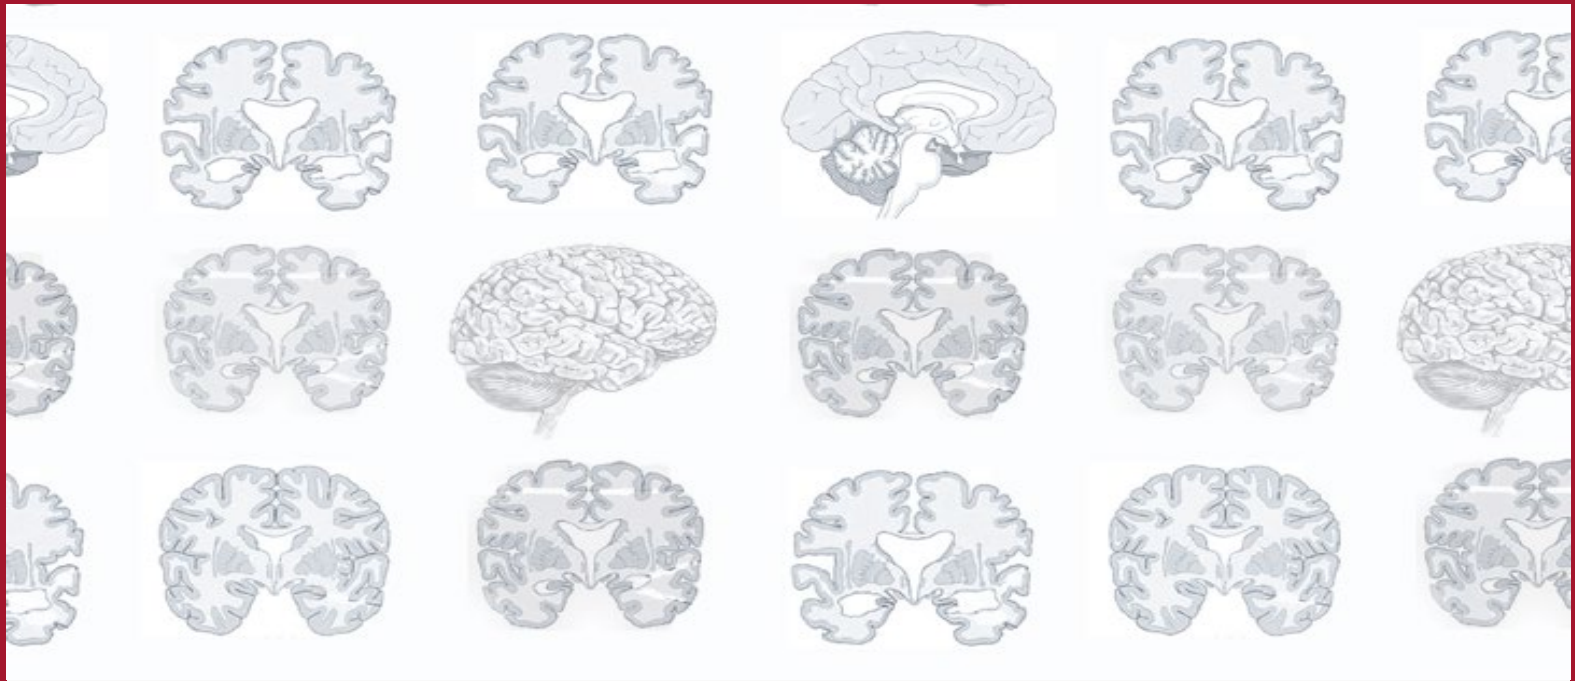

Please fill out the Pediatric NIH Stroke Scale form.

Thank you!!!

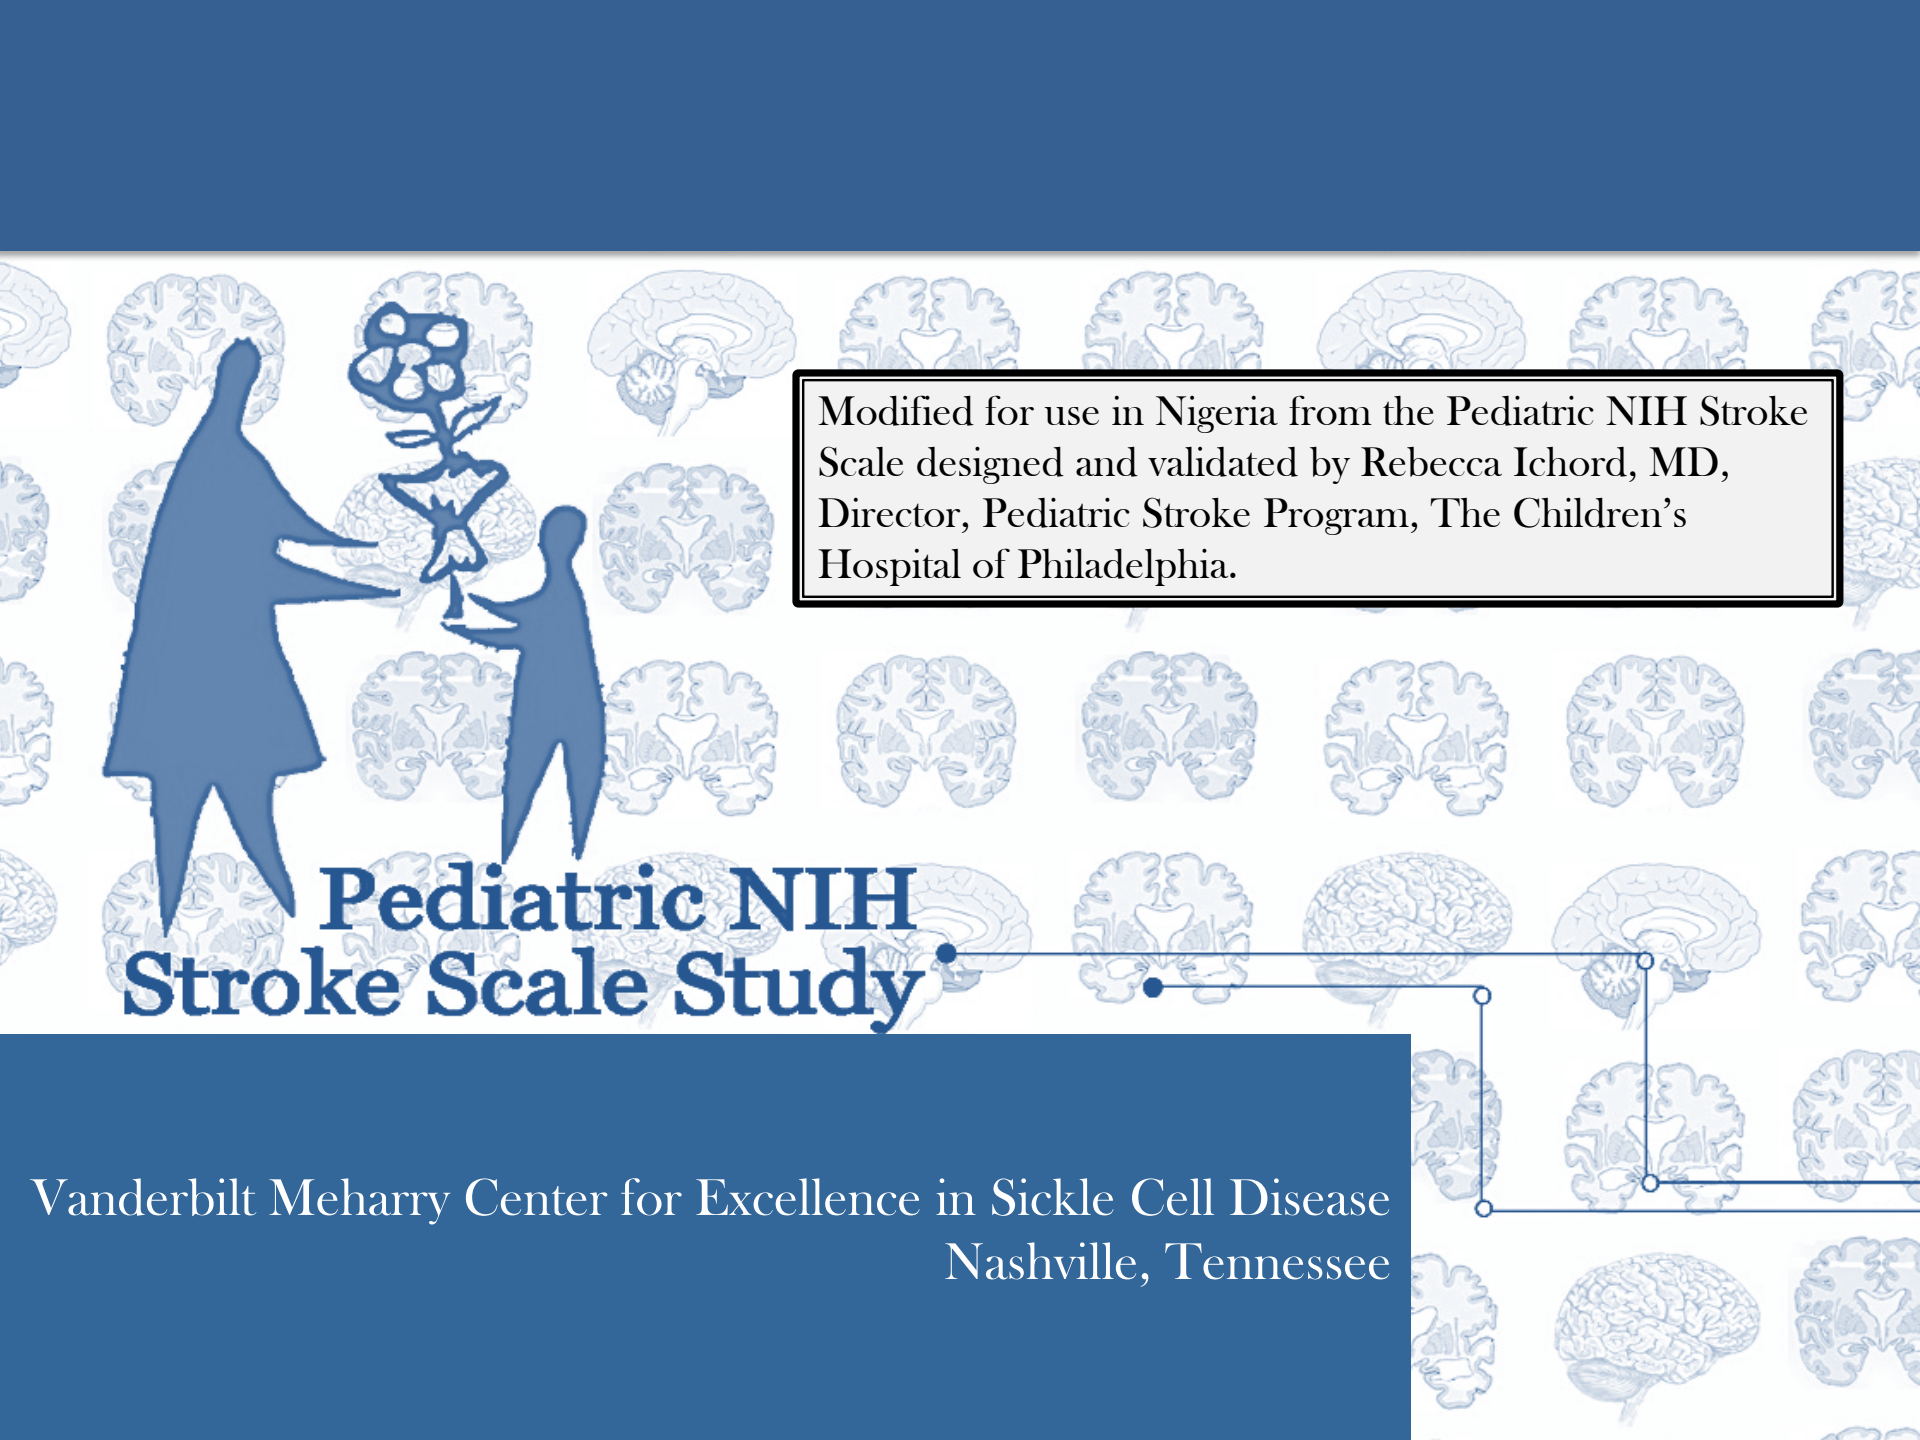The background features a repeating pattern of light blue brain slices in various orientations. On the left side, there is a dark blue silhouette of a taller figure (likely a doctor) and a shorter figure (likely a child) standing together. The taller figure is holding a large, stylized plant with a circular top and a stem with leaves. A white rectangular box with a black border is positioned in the upper right quadrant, containing text.

Modified for use in Nigeria from the Pediatric NIH Stroke Scale designed and validated by Rebecca Ichord, MD, Director, Pediatric Stroke Program, The Children's Hospital of Philadelphia.

# Pediatric NIH Stroke Scale Study

Vanderbilt Meharry Center for Excellence in Sickle Cell Disease  
Nashville, Tennessee
